# Supplementary material for: A dime a dozen: common structural attributes of 1,2-dimethylimidazolium halide ionic liquids
Source: Royal Society of Chemistry journal article supplement (doi:10.1039/d4nj01422g), 2024-01-01
Supplement: d4nj01422g1.pdf [file d4nj01422g1.pdf]

Supporting information for:

**A Dime a Dozen: Common Structural Attributes of 1,2-dimethylimidazolium Halide Ionic Liquids**

Marija Scheuren,<sup>a,†</sup> Rachel C. Sommers,<sup>a,†</sup> Mairead Boucher,<sup>a</sup> Christiane Carlos,<sup>a</sup> and Patrick C. Hillesheim<sup>\*,a</sup>

<sup>a</sup> Department of Chemistry and Physics, Ave Maria University, Ave Maria, Florida, 34142, United States

<sup>†</sup> Authors contributed equally to this manuscript

***Keywords***

Hirshfeld surfaces; ionic liquids; crystal structure; organic salts; molecular structure

\*Corresponding authors: [Patrick.Hillesheim@avemaria.edu](mailto:Patrick.Hillesheim@avemaria.edu)

Table S1. Crystallographic details for the two crystal structures.

| Compound                                                                   | DimeBr                                                                                                                                                                                                                                                 | DimeI                                                                                                                                                                                                                                                  |
|----------------------------------------------------------------------------|--------------------------------------------------------------------------------------------------------------------------------------------------------------------------------------------------------------------------------------------------------|--------------------------------------------------------------------------------------------------------------------------------------------------------------------------------------------------------------------------------------------------------|
| Chemical formula                                                           | Br·C <sub>7</sub> H <sub>13</sub> N <sub>2</sub>                                                                                                                                                                                                       | I·C <sub>7</sub> H <sub>13</sub> N <sub>2</sub>                                                                                                                                                                                                        |
| $M_r$                                                                      | 205.10                                                                                                                                                                                                                                                 | 252.09                                                                                                                                                                                                                                                 |
| Crystal system, space group                                                | Monoclinic, $P2_1/c$                                                                                                                                                                                                                                   | Monoclinic, $P2_1/c$                                                                                                                                                                                                                                   |
| Temperature (K)                                                            | 150                                                                                                                                                                                                                                                    | 150                                                                                                                                                                                                                                                    |
| $a, b, c$ (Å)                                                              | 6.8003 (4), 17.1874 (9), 7.9486 (4)                                                                                                                                                                                                                    | 9.0499 (4), 7.8198 (3), 13.5789 (5)                                                                                                                                                                                                                    |
| $\beta$ (°)                                                                | 101.531 (2)                                                                                                                                                                                                                                            | 95.844 (1)                                                                                                                                                                                                                                             |
| $V$ (Å <sup>3</sup> )                                                      | 910.28 (9)                                                                                                                                                                                                                                             | 955.96 (7)                                                                                                                                                                                                                                             |
| $Z$                                                                        | 4                                                                                                                                                                                                                                                      | 4                                                                                                                                                                                                                                                      |
| Radiation type                                                             | Mo $K\alpha$                                                                                                                                                                                                                                           | Mo $K\alpha$                                                                                                                                                                                                                                           |
| $\mu$ (mm <sup>-1</sup> )                                                  | 4.45                                                                                                                                                                                                                                                   | 3.29                                                                                                                                                                                                                                                   |
| Crystal size (mm)                                                          | 0.28 × 0.12 × 0.08                                                                                                                                                                                                                                     | 0.36 × 0.08 × 0.05                                                                                                                                                                                                                                     |
| Data collection                                                            |                                                                                                                                                                                                                                                        |                                                                                                                                                                                                                                                        |
| Diffractometer                                                             | Bruker AXS D8 Quest Eco diffractometer with PhotonII charge-integrating pixel array detector (CPAD)                                                                                                                                                    | Bruker AXS D8 Quest Eco diffractometer with PhotonII charge-integrating pixel array detector (CPAD)                                                                                                                                                    |
| Absorption correction                                                      | Multi-scan <i>SADABS2016/2</i> (Bruker,2016/2) was used for absorption correction. $wR2(int)$ was 0.0855 before and 0.0424 after correction. The Ratio of minimum to maximum transmission is 0.6344. The $\lambda/2$ correction factor is Not present. | Multi-scan <i>SADABS2016/2</i> (Bruker,2016/2) was used for absorption correction. $wR2(int)$ was 0.0710 before and 0.0435 after correction. The Ratio of minimum to maximum transmission is 0.7318. The $\lambda/2$ correction factor is Not present. |
| $T_{min}, T_{max}$                                                         | 0.473, 0.746                                                                                                                                                                                                                                           | 0.546, 0.746                                                                                                                                                                                                                                           |
| No. of measured, independent and observed [ $I > 2\sigma(I)$ ] reflections | 11610, 2167, 1837                                                                                                                                                                                                                                      | 19287, 2932, 2731                                                                                                                                                                                                                                      |
| $R_{int}$                                                                  | 0.030                                                                                                                                                                                                                                                  | 0.024                                                                                                                                                                                                                                                  |
| $(\sin \theta/\lambda)_{max}$ (Å <sup>-1</sup> )                           | 0.659                                                                                                                                                                                                                                                  | 0.716                                                                                                                                                                                                                                                  |
| Refinement                                                                 |                                                                                                                                                                                                                                                        |                                                                                                                                                                                                                                                        |
| $R[F^2 > 2\sigma(F^2)], wR(F^2), S$                                        | 0.025, 0.060, 1.09                                                                                                                                                                                                                                     | 0.022, 0.044, 1.20                                                                                                                                                                                                                                     |
| No. of reflections                                                         | 2167                                                                                                                                                                                                                                                   | 2932                                                                                                                                                                                                                                                   |
| No. of parameters                                                          | 94                                                                                                                                                                                                                                                     | 95                                                                                                                                                                                                                                                     |
| H-atom treatment                                                           | H-atom parameters constrained                                                                                                                                                                                                                          | H-atom parameters constrained                                                                                                                                                                                                                          |
| $\Delta\rho_{max}, \Delta\rho_{min}$ (e Å <sup>-3</sup> )                  | 0.45, -0.39                                                                                                                                                                                                                                            | 0.66, -0.85                                                                                                                                                                                                                                            |

Table S2. Torsion angle data used in the analysis of the ethyl group geometries.

| CSD Entry | <b>C2-N1-C6-C7</b><br>Torsion | Absolute Value |
|-----------|-------------------------------|----------------|
| 1053981   | 143.50                        | 143.50         |
| 1053983   | 147.11                        | 147.11         |
| 1053984   | 146.34                        | 146.34         |
| 1056065   | 85.40                         | 85.40          |
| 1175742   | -82.34                        | 82.34          |
| 1179274   | 82.60                         | 82.60          |
| 1179276   | 104.30                        | 104.30         |
| 1284386   | 98.65                         | 98.65          |
| 1284387   | 99.89                         | 99.89          |
| 1284388   | 143.87                        | 143.87         |
| 1414151   | 142.94                        | 142.94         |
| 1472569a  | -95.58                        | 95.58          |
| 1472569b  | -80.16                        | 80.16          |
| 1472569c  | -84.51                        | 84.51          |
| 1472570a  | 83.73                         | 83.73          |
| 1472570b  | 95.14                         | 95.14          |
| 1472570c  | 81.00                         | 81.00          |
| 1472571a  | 91.81                         | 91.81          |
| 1472571b  | -82.86                        | 82.86          |
| 1472571c  | -84.84                        | 84.84          |
| 1485858   | 83.12                         | 83.12          |
| 1485859   | 79.15                         | 79.15          |
| 1485860a  | -77.65                        | 77.65          |
| 1485860b  | 79.83                         | 79.83          |
| 1514187   | -93.33                        | 93.33          |
| 1537072   | 114.02                        | 114.02         |
| 1537073a  | 78.07                         | 78.07          |
| 1537073b  | 101.94                        | 101.94         |
| 1537082a  | 84.93                         | 84.93          |
| 1537082b  | 93.62                         | 93.62          |
| 1579534   | 83.65                         | 83.65          |
| 1579535   | -85.99                        | 85.99          |
| 1579536   | 85.86                         | 85.86          |
| 1579537   | 88.27                         | 88.27          |
| 1579538   | -89.10                        | 89.10          |
| 1579539   | -88.90                        | 88.90          |
| 1579540   | -133.00                       | 133.00         |
| 169678a   | -83.37                        | 83.37          |
| 169678b   | -104.00                       | 104.00         |
| 1960297a  | 89.12                         | 89.12          |

|          |         |        |
|----------|---------|--------|
| 1960297b | -100.79 | 100.79 |
| 2044903  | -83.70  | 83.70  |
| 2044904  | -79.44  | 79.44  |
| 2052351  | 86.43   | 86.43  |
| 2052354  | 174.38  | 174.38 |
| 2068820a | -97.59  | 97.59  |
| 2068820b | 95.27   | 95.27  |
| 2068824a | 87.53   | 87.53  |
| 2068824b | -100.91 | 100.91 |
| 2112307  | 91.00   | 91.00  |
| 2120110  | -144.31 | 144.31 |
| 274594   | -93.07  | 93.07  |
| 653109   | 90.31   | 90.31  |
| 794465   | 110.31  | 110.31 |
| 841379   | 73.84   | 73.84  |
| 854947   | -174.96 | 174.96 |
| 920917   | -143.16 | 143.16 |
| 973145   | 98.38   | 98.38  |
| 975938   | 79.22   | 79.22  |
